# Supplementary material for: Multi-site isomerization of synergistically regulated stimuli-responsive AIE materials toward multi-level decryption
Source: Royal Society of Chemistry journal article supplement (doi:10.1039/d3sc06191d), 2024-01-01
Supplement: d3sc06191d1.pdf [file d3sc06191d1.pdf]

## Electronic Supplementary Information

Multi-site isomerization of synergistically regulated stimuli-responsive AIE materials toward multi-level decryption

Weiren Zhong,<sup>+[a,b]</sup> Jianyu Zhang,<sup>+[c]</sup> Yuting Lin,<sup>[a]</sup> Shouji Li,<sup>[a]</sup> Yalan Yang,<sup>[a]</sup> Wen-Jin Wang,<sup>[d]</sup> Chuanling Si,<sup>\*[c]</sup> Fritz E. Kühn,<sup>[f]</sup> Zheng Zhao,<sup>[d]</sup> Xu-Min Cai,<sup>\*[a,b]</sup> and Ben Zhong Tang <sup>\*[c,d]</sup>

<sup>[a]</sup>Jiangsu Co-Innovation Center of Efficient Processing and Utilization of Forest Resources, College of Chemical Engineering, Nanjing Forestry University, Nanjing 210037, China. <sup>[b]</sup>Guangdong Provincial Key Laboratory of Luminescence from Molecular Aggregates, Guangzhou 510640, China. <sup>[c]</sup>Department of Chemistry, Hong Kong Branch of Chinese National Engineering Research Center for Tissue Restoration and Reconstruction, The Hong Kong University of Science and Technology, Hongkong 999077, China. <sup>[d]</sup>School of Science and Engineering, Shenzhen Institute of Aggregate Science and Technology, The Chinese University of Hong Kong, Shenzhen (CUHK-Shenzhen), Shenzhen 518172, China. <sup>[e]</sup>State Key Laboratory of Biobased Fiber Manufacturing Technology, Tianjin Key Laboratory of Pulp and Paper, Tianjin University of Science and Technology, Tianjin 300457, China. <sup>[f]</sup>Molecular Catalysis, Department of Chemistry & Catalysis Research Center, School of Natural Sciences, Technische Universität München, München D-85747, Germany. <sup>[+]</sup>These authors contributed equally: Weiren Zhong and Jianyu Zhang.

\*Corresponding author:

[xumin.cai@njfu.edu.cn](mailto:xumin.cai@njfu.edu.cn); [sichli@tust.edu.cn](mailto:sichli@tust.edu.cn); [tangbenz@cuhk.edu.cn](mailto:tangbenz@cuhk.edu.cn).

## Contents

|                                                                                                                                                                                                                                                                                                                                                                                                |          |
|------------------------------------------------------------------------------------------------------------------------------------------------------------------------------------------------------------------------------------------------------------------------------------------------------------------------------------------------------------------------------------------------|----------|
| <b>Experimental Section</b>                                                                                                                                                                                                                                                                                                                                                                    | 1-3      |
| Materials and instrumentations                                                                                                                                                                                                                                                                                                                                                                 | 1        |
| Synthetic procedures                                                                                                                                                                                                                                                                                                                                                                           | 1        |
| <br><b>Schemes, Figures, and Tables</b>                                                                                                                                                                                                                                                                                                                                                        | <br>4-16 |
| <b>Scheme S1.</b> The synthesis routes of <i>p</i> -TPA-Br, <i>o</i> -Br-TPA, and <i>p</i> -Br-TPA.                                                                                                                                                                                                                                                                                            | 4        |
| <b>Figure S1.</b> <sup>1</sup> H NMR spectrum of <i>p</i> -TPA-Br.                                                                                                                                                                                                                                                                                                                             | 4        |
| <b>Figure S2.</b> <sup>13</sup> C NMR spectrum of <i>p</i> -TPA-Br.                                                                                                                                                                                                                                                                                                                            | 5        |
| <b>Figure S3.</b> HRMS spectrum of <i>p</i> -TPA-Br.                                                                                                                                                                                                                                                                                                                                           | 5        |
| <b>Figure S4.</b> <sup>1</sup> H NMR spectrum of <i>o</i> -Br-TPA.                                                                                                                                                                                                                                                                                                                             | 6        |
| <b>Figure S5.</b> <sup>13</sup> C NMR spectrum of <i>o</i> -Br-TPA.                                                                                                                                                                                                                                                                                                                            | 6        |
| <b>Figure S6.</b> HRMS spectrum of <i>o</i> -Br-TPA.                                                                                                                                                                                                                                                                                                                                           | 7        |
| <b>Figure S7.</b> <sup>1</sup> H NMR spectrum of <i>p</i> -Br-TPA.                                                                                                                                                                                                                                                                                                                             | 7        |
| <b>Figure S8.</b> <sup>13</sup> C NMR spectrum of <i>p</i> -Br-TPA.                                                                                                                                                                                                                                                                                                                            | 8        |
| <b>Figure S9.</b> HRMS spectrum of <i>p</i> -Br-TPA.                                                                                                                                                                                                                                                                                                                                           | 8        |
| <b>Figure S10.</b> Absorption spectra of <i>o</i> -TPA-Br, <i>p</i> -TPA-Br, <i>o</i> -Br-TPA, and <i>p</i> -Br-TPA in dilute ACN solution (20 μM).                                                                                                                                                                                                                                            | 9        |
| <b>Figure S11.</b> PL spectra of <i>o</i> -Br-TPA in ACN solution with different concentrations.                                                                                                                                                                                                                                                                                               | 9        |
| <b>Figure S12.</b> (a) PL spectra of <i>o</i> -Br-TPA in EtOH/glycerol mixtures with different fractions of glycerol. (b) The plots of the enol and keto emission intensity at the maximum versus the composition of the glycerol mixture of <i>o</i> -Br-TPA. (c) The plot of keto/enol emission intensity at the maximum versus the composition of the glycerol mixture of <i>o</i> -Br-TPA. | 10       |
| <b>Figure S13.</b> Fluorescence photographs of <i>o</i> -Br-TPA (in ACN), and <i>p</i> -Br-TPA (in THF) at RT and 77 K, respectively.                                                                                                                                                                                                                                                          | 10       |
| <b>Figure S14.</b> Absorption spectra of (a) <i>o</i> -TPA-Br, (b) <i>p</i> -TPA-Br, (c) <i>o</i> -Br-TPA, and (d) <i>p</i> -Br-TPA in solvents of varying polarity.                                                                                                                                                                                                                           | 11       |
| <b>Figure S15.</b> The PL spectra of (a) <i>o</i> -TPA-Br, (b) <i>p</i> -TPA-Br, (c) <i>o</i> -Br-TPA, and (d) <i>p</i> -Br-TPA in solvents of varying polarity.                                                                                                                                                                                                                               | 12       |
| <b>Figure S16.</b> The molecular structures of isomers that regulate excited-state processes.                                                                                                                                                                                                                                                                                                  | 13       |
| <b>Table S1.</b> Crystallographic data for <i>o</i> -Br-TPA and <i>p</i> -Br-TPA.                                                                                                                                                                                                                                                                                                              | 14       |
| <b>Figure S17.</b> The photographs of (a) <i>o</i> -TPA-Br and (b) <i>o</i> -Br-TPA before and after grinding tanken under 365 nm lamp irradiation.                                                                                                                                                                                                                                            | 15       |
| <b>Figure S18.</b> The chemical conformations, dimers, and packings of (a) <i>o</i> -TPA-Br and (b) <i>o</i> -Br-TPA.                                                                                                                                                                                                                                                                          | 15       |
| <b>Figure S19.</b> Fluorescence photographs of (a) <i>o</i> -TPA-Br and (b) <i>o</i> -Br-TPA as solid (pristine, sample fumed with TFA, sample fumed with TEA).                                                                                                                                                                                                                                | 16       |
| <b>Figure S20.</b> Absorption spectra of (a) <i>o</i> -TPA-Br, (b) <i>p</i> -TPA-Br, and (c) <i>o</i> -Br-TPA in pure                                                                                                                                                                                                                                                                          |          |

|                                                                                                                                                                         |    |
|-------------------------------------------------------------------------------------------------------------------------------------------------------------------------|----|
| ACN by adding different equivalents of TFA.                                                                                                                             | 16 |
| <b>Figure S21.</b> <sup>1</sup> H NMR spectra of (a) <i>o</i> -TPA-Br and (b) <i>o</i> -Br-TPA in CDCl <sub>3</sub> before and after TFA fuming in 6.0–14.0 ppm region. | 17 |
| <b>Figure S22.</b> Fluorescence photographs of the ground <i>p</i> -TPA-Br before and after TFA/TEA treatments.                                                         | 17 |
| <b>References</b>                                                                                                                                                       | 17 |

## Experimental Section

### Materials and instrumentations

Unless specific requirements, all the organic solvents are purchased and used without additional purifications. *o*-TPA-Br is synthesized according to a previous report <sup>[1]</sup>. 4-(Diphenylamino) phenylboronic acid (Aladdin, 98%), 5-bromosalicylaldehyde (Aladdin, 98%), 4-bromoaniline (Aladdin, 99%), 2-bromoaniline (Aladdin, 98%), tetrakis (triphenylphosphine) palladium (Energy Chemical, 99%), trifluoroacetic acid (TFA) (Energy Chemical, 99%), and triethylamine (TEA) (Sinopharm Chemical Reagent Co., Ltd., 99.0%) are purchased and used directly without further purification. Nuclear magnetic resonance (NMR) spectra are obtained using a Bruker AVANCE III HD spectrometer (600 MHz for <sup>1</sup>H and 150 MHz for <sup>13</sup>C) in a solution of CDCl<sub>3</sub>. High-resolution mass spectrometry (HRMS) spectra are acquired using a Q Exactive (Thermo Scientific, Germany) mass spectrometer operating with an ESI mode. Ultraviolet-visible (UV–Vis) absorption spectra are measured on a Shimadzu UV-2450 spectrometer. Photoluminescence (PL) spectra are performed on a Fluoromax-4 spectrofluorometer. UV–Vis diffuse reflectance (UV-DRS) spectra are acquired utilizing a PE Lambda 950 UV–Vis–NIR spectrometer. Powder X-ray diffraction (PXRD) experiments are conducted using a Rigaku Ultima IV diffractometer with Cu K $\alpha$  radiation. Single-crystal data of *o*-TPA-Br (CCDC = 2190006) is from a previous report <sup>[1]</sup>. Single-crystal data of *o*-Br-TPA (CCDC = 2293108) is selected and mounted on CCD area detector using Mo K $\alpha$  radiation ( $\lambda$  = 0.71073 Å). Single-crystal data of *p*-Br-TPA (CCDC = 2252820) is selected and mounted on an Xcalibur, Eos, Gemini diffractometer using Cu K $\alpha$  radiation ( $\lambda$  = 1.54184 Å).

### Synthetic procedures

***p*-TPA-Br:** 4-(Diphenylamino) phenylboronic acid (300 mg, 1.04 mmol), 4-bromoaniline (214 mg, 1.25 mmol), tetrakis (triphenylphosphine) palladium (48 mg, 0.04 mmol), and 1 mL of saturated K<sub>2</sub>CO<sub>3</sub> are added rapidly to a 3 mL solution of toluene. These feeding processes are conducted under N<sub>2</sub> atmosphere. After stirring the reaction mixture at 115 °C for 6 h, it is extracted with DCM/H<sub>2</sub>O and then purified by silica gel column chromatography using eluents of petroleum ether/ethyl acetate (volume ratio: 20/1). Then, the intermediate of A-TPA is

obtained with a yield of 60%. A-TPA (100 mg, 0.30 mmol) is slowly added to a vigorously stirred solution of 5-bromosalicylaldehyde (72 mg, 0.36 mmol) in 20 mL of EtOH. The reaction mixture is refluxed for 3 h and cooled to room temperature afterward. Yield: 80%.  $^1\text{H}$  NMR (600 MHz,  $\text{CDCl}_3$ )  $\delta$  13.37 (s, 1H), 8.61 (s, 1H), 7.64 (d,  $J = 8.4$  Hz, 2H), 7.52 (d, 1H), 7.50 (d,  $J = 8.6$  Hz, 2H), 7.45 (dd,  $J = 8.8, 2.4$  Hz, 1H), 7.35 (d,  $J = 8.4$  Hz, 2H), 7.28 (t,  $J = 7.9$  Hz, 4H), 7.15 (d,  $J = 8.4$  Hz, 6H), 7.06 (t,  $J = 7.3$  Hz, 2H), 6.94 (d,  $J = 8.8$  Hz, 1H).  $^{13}\text{C}$  NMR (150 MHz,  $\text{CDCl}_3$ )  $\delta$  160.55, 160.32, 147.69, 140.02, 135.77, 134.30, 129.46, 127.69, 124.70, 123.84, 123.25, 121.80, 120.83, 119.40, 110.65. HRMS (ESI,  $m/z$ ):  $[\text{M}+\text{H}]^+$  calcd for  $\text{C}_{31}\text{H}_{24}\text{BrN}_2\text{O}$ : 519.1067; found: 519.1053.

***o*-Br-TPA:** 4-(Diphenylamino) phenylboronic acid (300 mg, 1.04 mmol), 5-bromosalicylaldehyde (250 mg, 1.25 mmol), tetrakis (triphenylphosphine) palladium (48 mg, 0.04 mmol), and 1 mL of saturated  $\text{K}_2\text{CO}_3$  are added rapidly to a 3 mL solution of toluene. The subsequent reaction conditions and post-treatment methods are consistent with ATPA-*p*-SAB. The intermediate of TPA-SA is obtained with a yield of 60%. TPA-SA (100 mg, 0.27 mmol) is slowly added to a vigorously stirred solution of 2-bromoaniline (56 mg, 0.32 mmol) in 20 mL of EtOH. The reaction mixture is refluxed for 3 h and cooled to room temperature afterward. Yield: 80%.  $^1\text{H}$  NMR (600 MHz,  $\text{CDCl}_3$ )  $\delta$  13.13 (s, 1H), 8.67 (s, 1H), 7.70 (d,  $J = 7.9$  Hz, 1H), 7.66 – 7.60 (m, 2H), 7.45 (d,  $J = 8.1$  Hz, 2H), 7.39 (t,  $J = 7.6$  Hz, 1H), 7.32 – 7.26 (m, 4H), 7.22 – 7.08 (m, 9H), 7.05 (t,  $J = 7.2$  Hz, 3H).  $^{13}\text{C}$  NMR (150 MHz,  $\text{CDCl}_3$ )  $\delta$  163.32, 160.56, 147.80, 147.05, 146.84, 134.17, 133.46, 132.23, 130.41, 128.64, 127.33, 124.47, 124.26, 123.05, 120.16, 119.23, 118.07. HRMS (ESI,  $m/z$ ):  $[\text{M}+\text{H}]^+$  calcd for  $\text{C}_{31}\text{H}_{24}\text{BrN}_2\text{O}$ : 519.1067; found: 519.1046.

***p*-Br-TPA:** TPA-SA (100 mg, 0.27 mmol) is slowly added to a vigorously stirred solution of 4-bromoaniline (56 mg, 0.32 mmol) in 20 mL of EtOH. The reaction mixture is refluxed for 3 h and cooled to room temperature afterward. Yield: 80%.  $^1\text{H}$  NMR (600 MHz,  $\text{CDCl}_3$ )  $\delta$  12.97 (s, 1H), 8.66 (s, 1H), 7.62 (dd,  $J = 8.6, 2.3$  Hz, 1H), 7.59 (d,  $J = 2.3$  Hz, 1H), 7.57–7.53 (m, 2H), 7.46–7.42 (m, 2H), 7.38–7.27 (m, 4H), 7.19–7.17 (m, 2H), 7.16–7.12 (m, 6H), 7.09 (d,  $J = 8.6$  Hz, 1H), 7.04 (t,  $J = 7.4$  Hz, 2H).  $^{13}\text{C}$  NMR (150 MHz,  $\text{CDCl}_3$ )  $\delta$  163.20, 160.42, 147.84, 147.67, 147.12, 134.18, 132.69, 132.24, 132.02, 129.44, 127.34, 124.52, 124.27, 123.09,

122.98, 120.63, 119.27. HRMS (ESI, m/z):  $[M+H]^+$  calcd for  $C_{31}H_{24}BrN_2O$ : 519.1067; found: 519.1055.

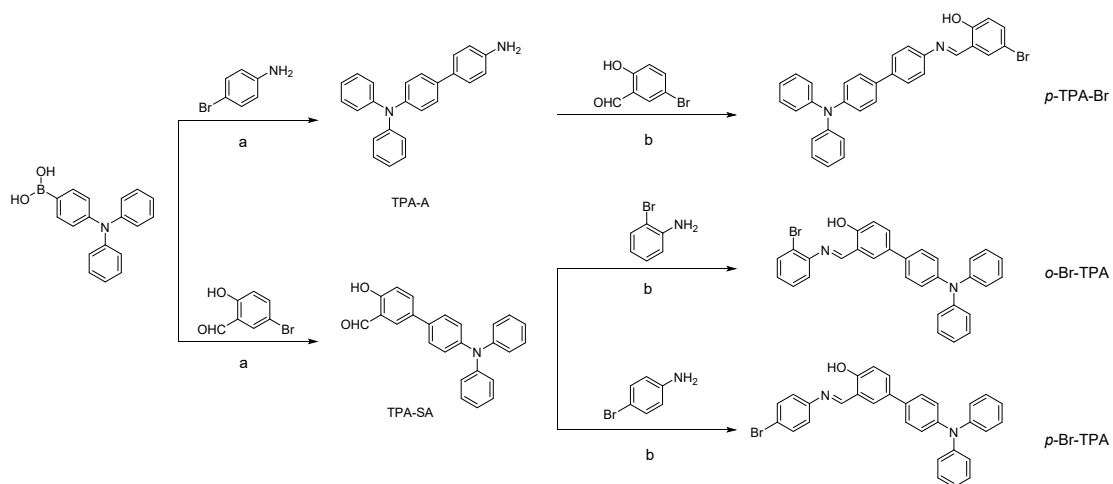

**Scheme S1.** The synthesis routes of *p*-TPA-Br, *o*-Br-TPA, and *p*-Br-TPA. (a) Toluene, Pd(PPh<sub>3</sub>)<sub>4</sub>, K<sub>2</sub>CO<sub>3</sub>, 6 h. (b) EtOH, 3 h.

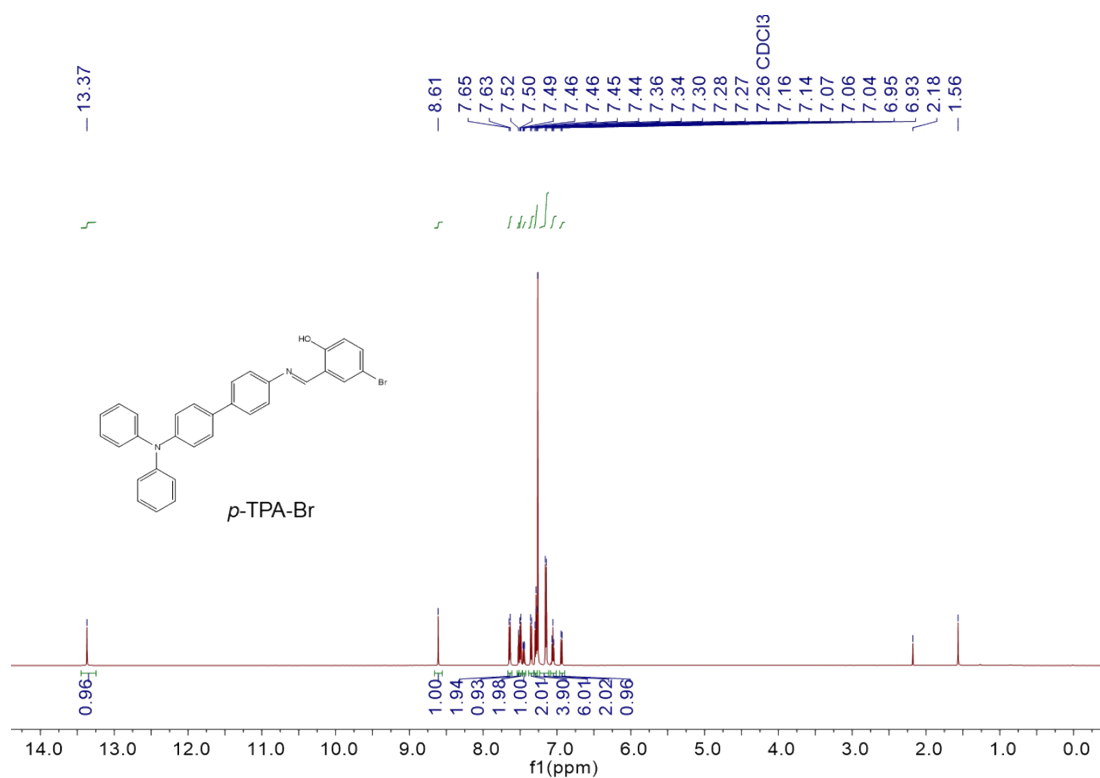

**Figure S1.** <sup>1</sup>H NMR spectrum of *p*-TPA-Br.

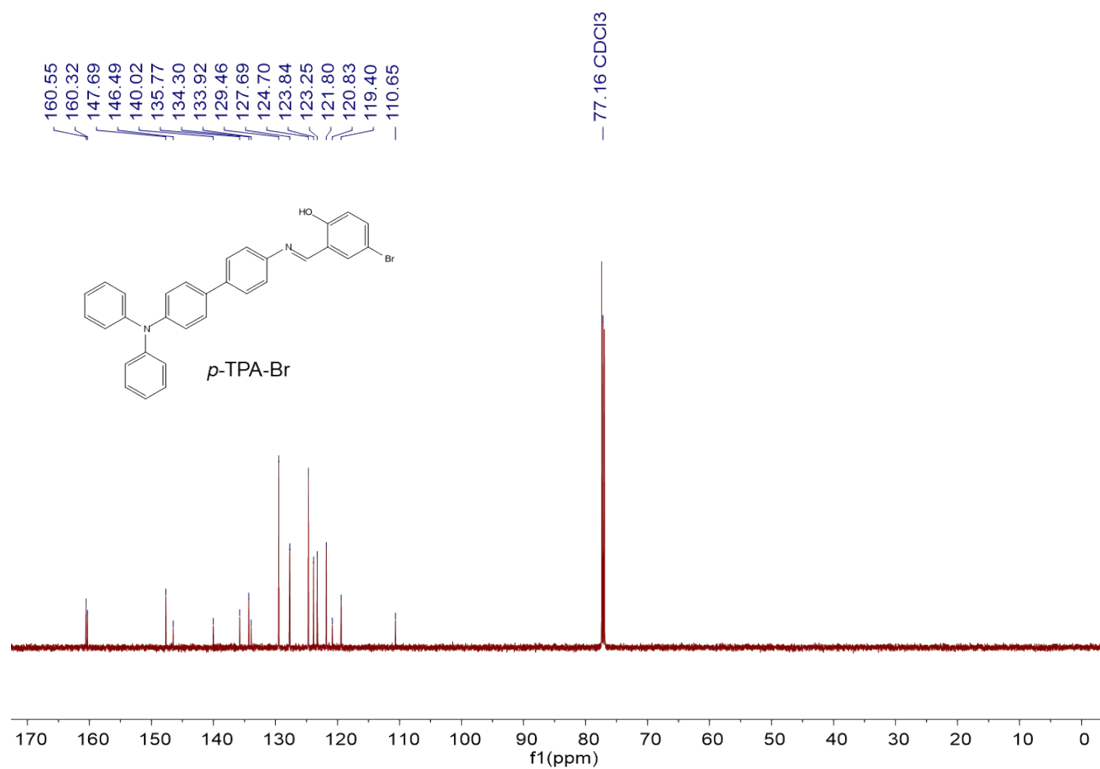

**Figure S2.** <sup>13</sup>C NMR spectrum of *p*-TPA-Br.

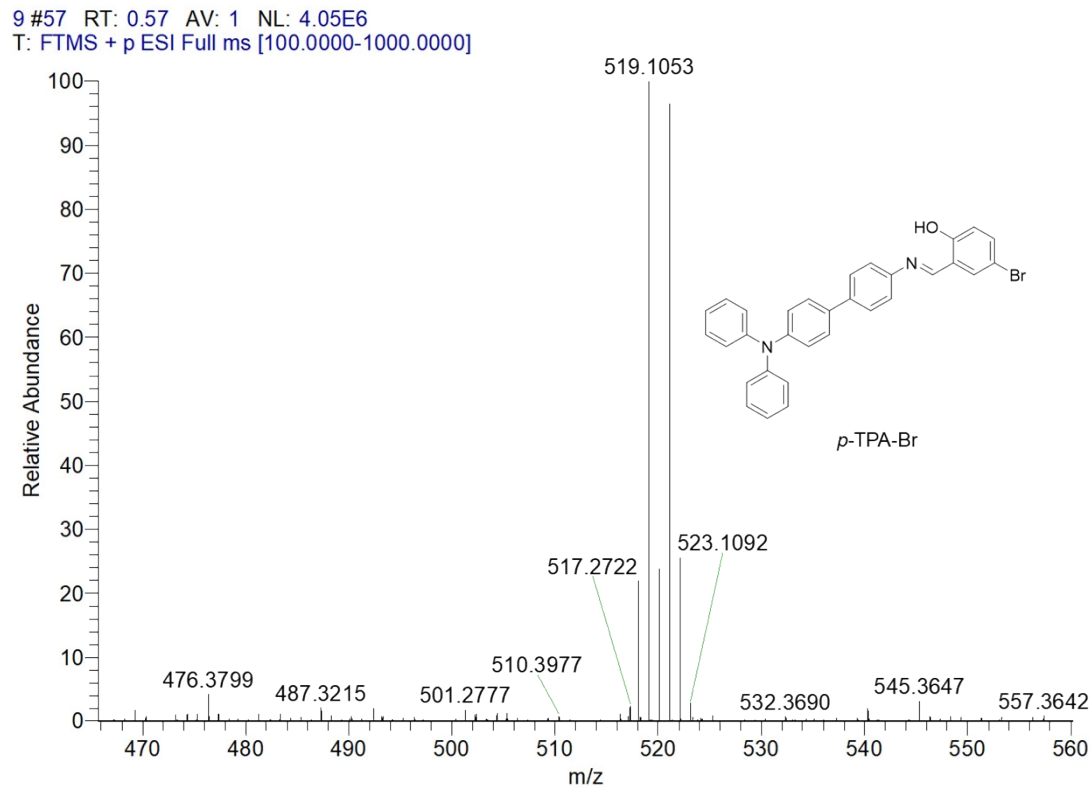

**Figure S3.** HRMS spectrum of *p*-TPA-Br.

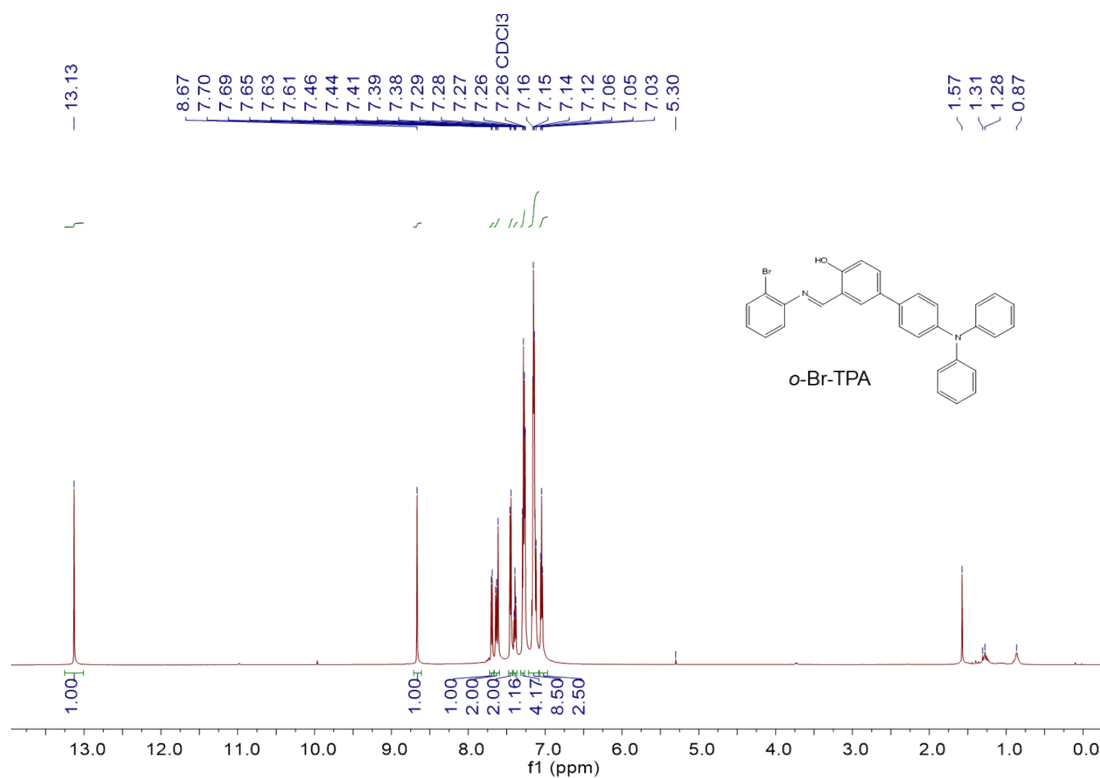

**Figure S4.** <sup>1</sup>H NMR spectrum of *o*-Br-TPA.

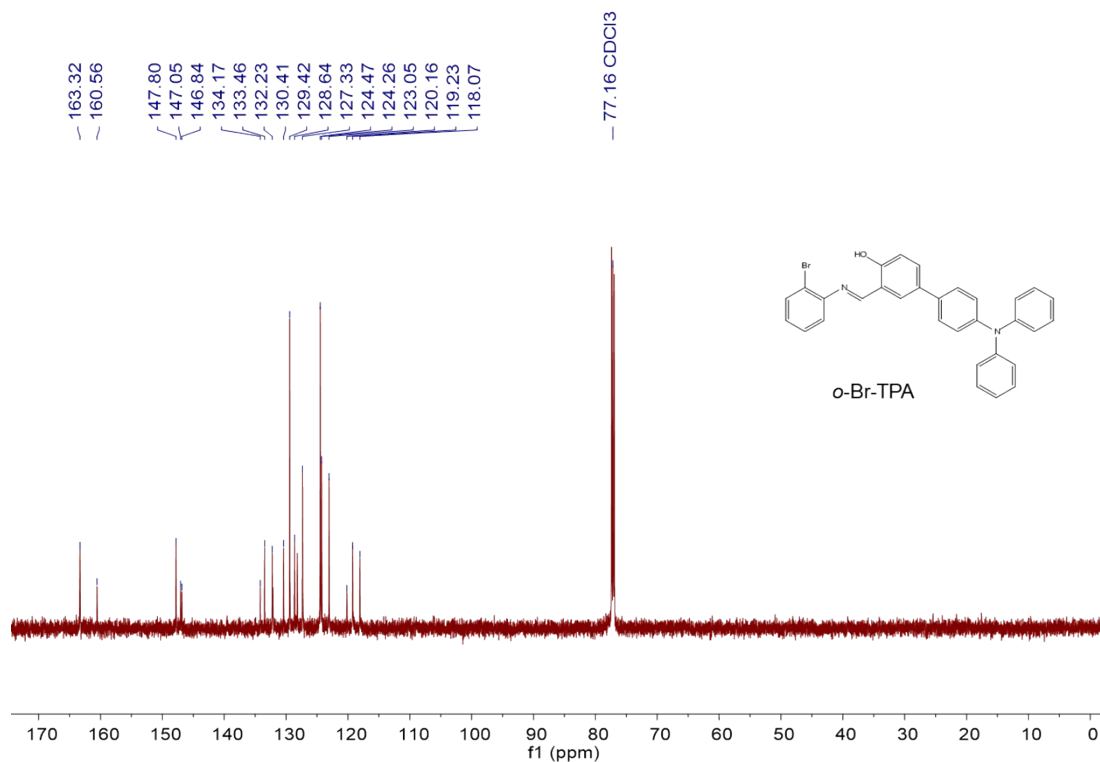

**Figure S5.** <sup>13</sup>C NMR spectrum of *o*-Br-TPA.

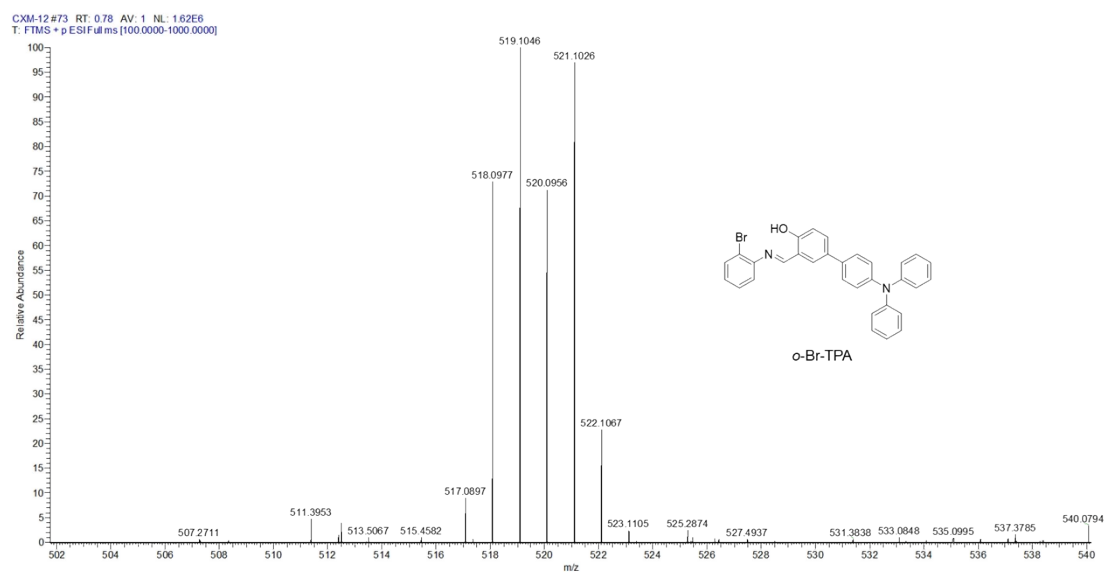

**Figure S6.** HRMS spectrum of *o*-Br-TPA.

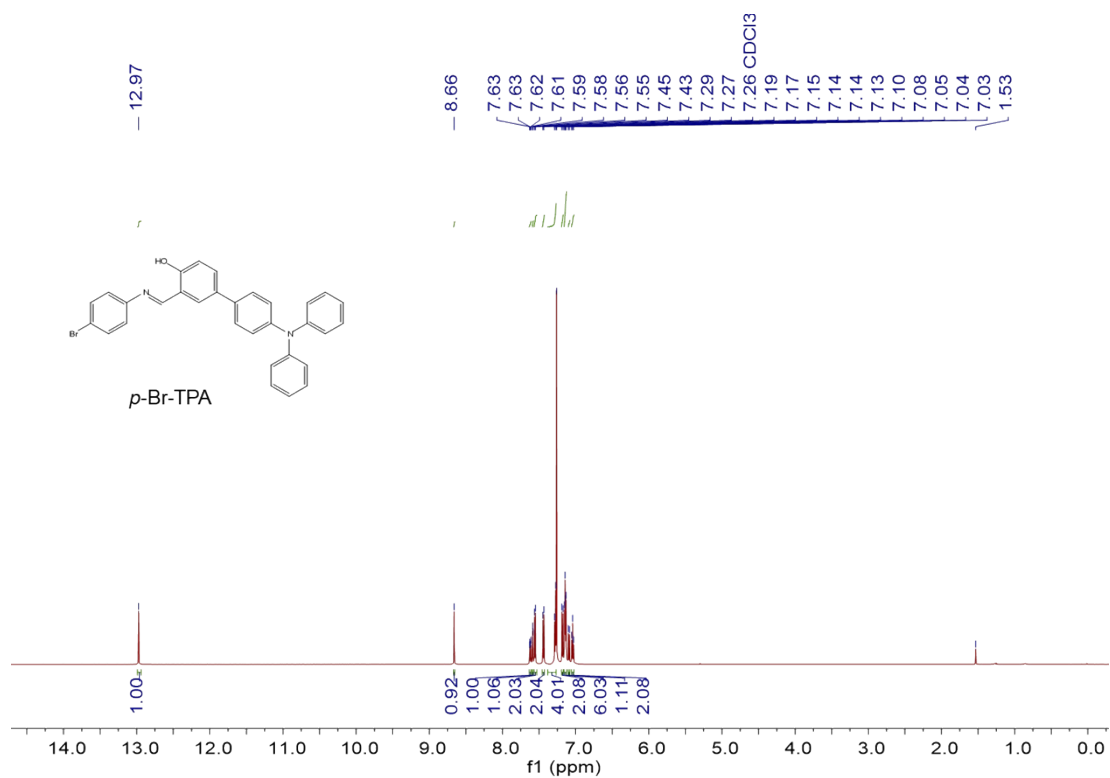

**Figure S7.**  $^1\text{H}$  NMR spectrum of *p*-Br-TPA.

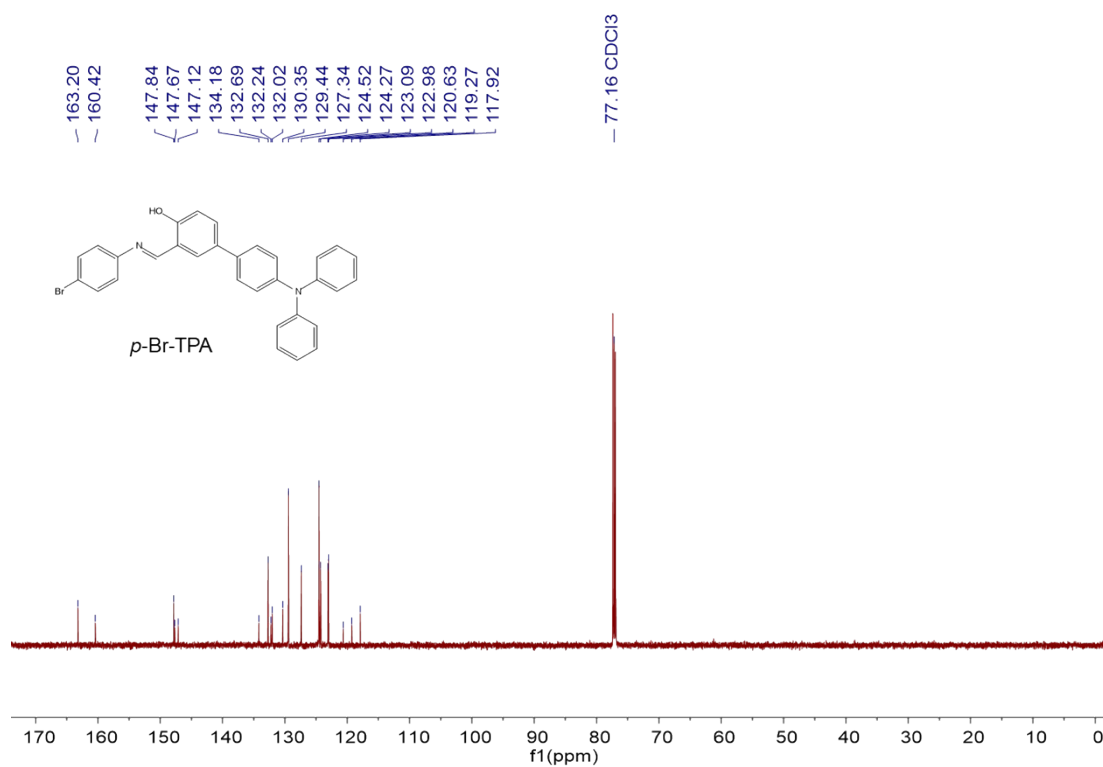

**Figure S8.** <sup>13</sup>C NMR spectrum of *p*-Br-TPA.

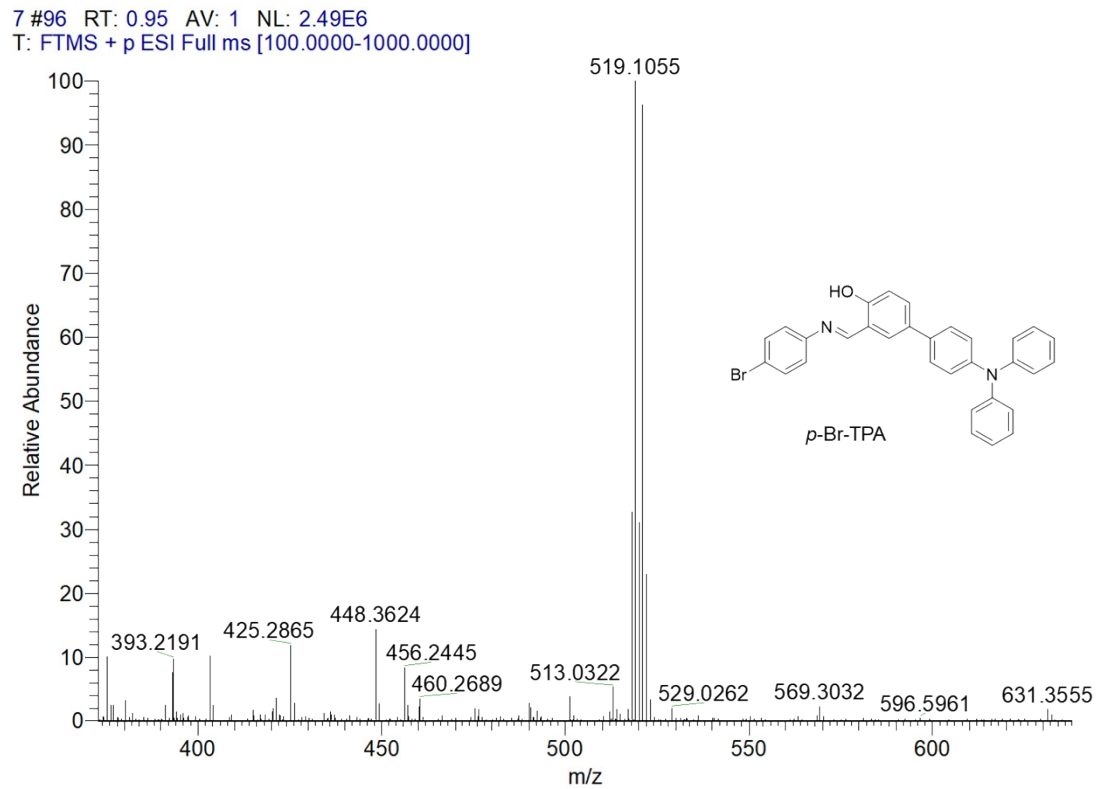

**Figure S9.** HRMS spectrum of *p*-Br-TPA.

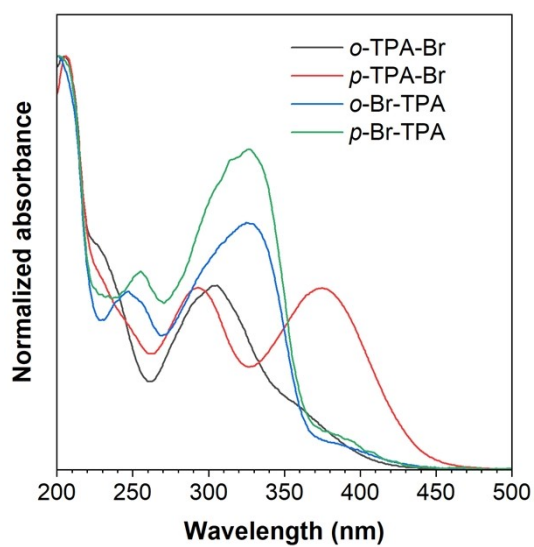

**Figure S10.** Absorption spectra of *o*-TPA-Br, *p*-TPA-Br, *o*-Br-TPA, and *p*-Br-TPA in dilute ACN solution (20 μM).

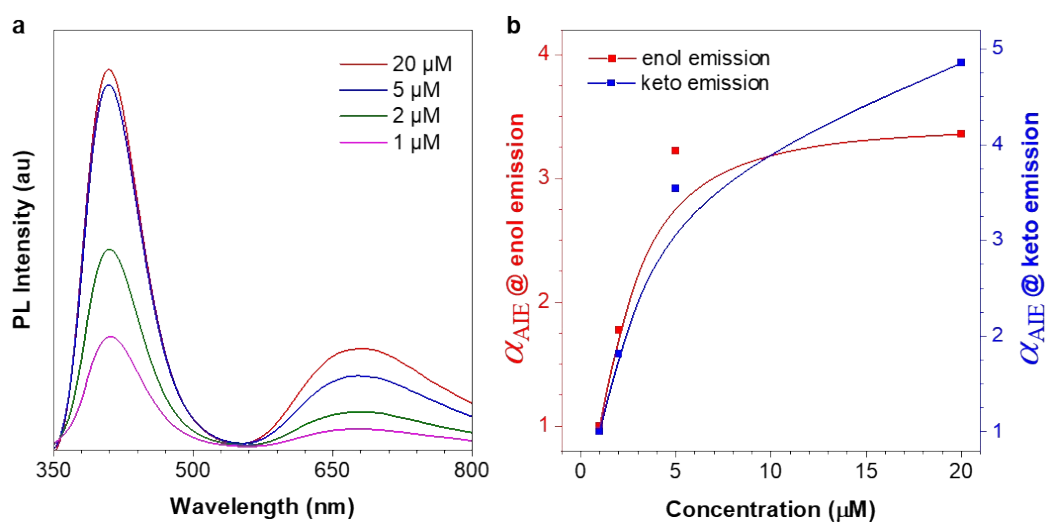

**Figure S11.** PL spectra of *o*-Br-TPA in ACN solution with different concentrations.  $\lambda_{\text{ex}} = 326$  nm.

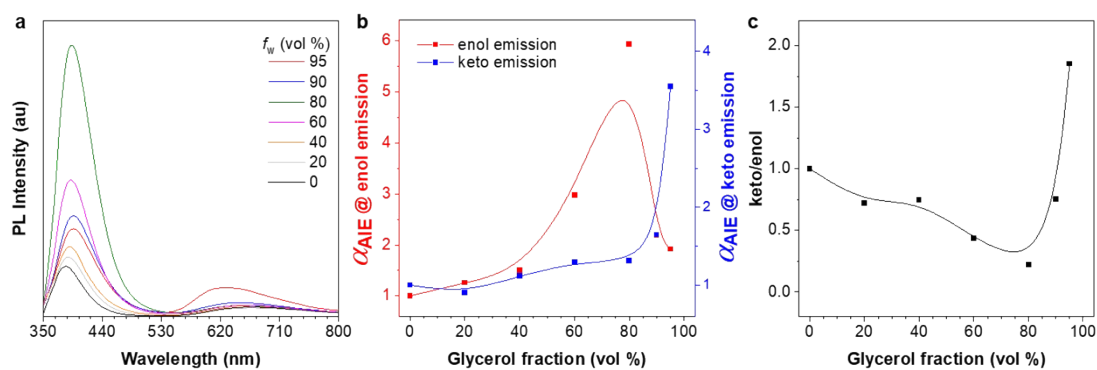

**Figure S12.** (a) PL spectra of *o*-Br-TPA in EtOH/glycerol mixtures with different fractions of glycerol. (b) The plots of the enol and keto emission intensity at the maximum versus the composition of the glycerol mixture of *o*-Br-TPA.  $\alpha_{AIE} = I/I_0$ ,  $I_0$  = PL intensity in pure EtOH. (c) The plot of keto/enol emission intensity at the maximum versus the composition of the glycerol mixture of *o*-Br-TPA. Concentration: 20  $\mu\text{M}$ .  $\lambda_{\text{ex}}$ : 326 nm.

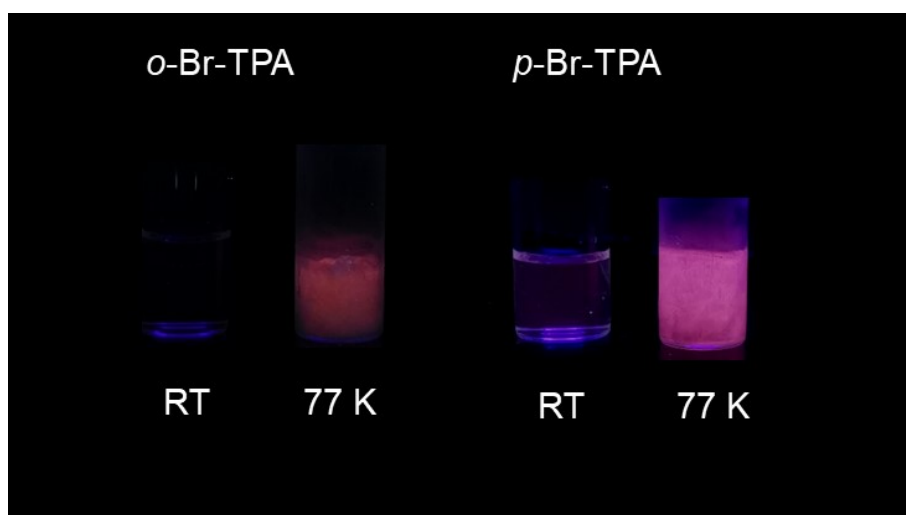

**Figure S13.** Fluorescence photographs of *o*-Br-TPA (in ACN), and *p*-Br-TPA (in THF) at RT and 77 K, respectively.  $\lambda_{\text{ex}}$ : 365 nm. Concentration: 20  $\mu\text{M}$ .

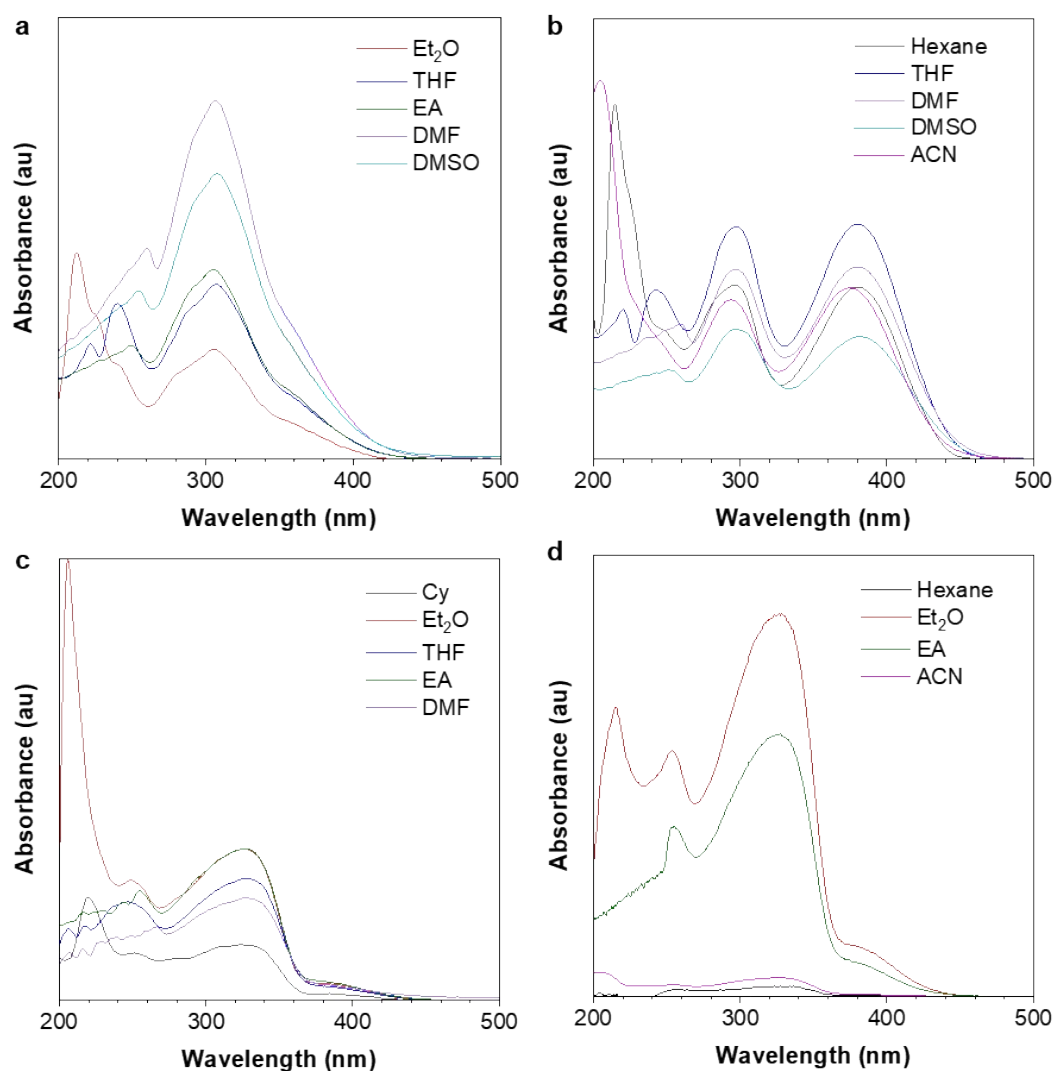

**Figure S14.** Absorption spectra of (a) *o*-TPA-Br, (b) *p*-TPA-Br, (c) *o*-Br-TPA, and (d) *p*-Br-TPA in solvents of varying polarity. Concentration: 20  $\mu$ M.

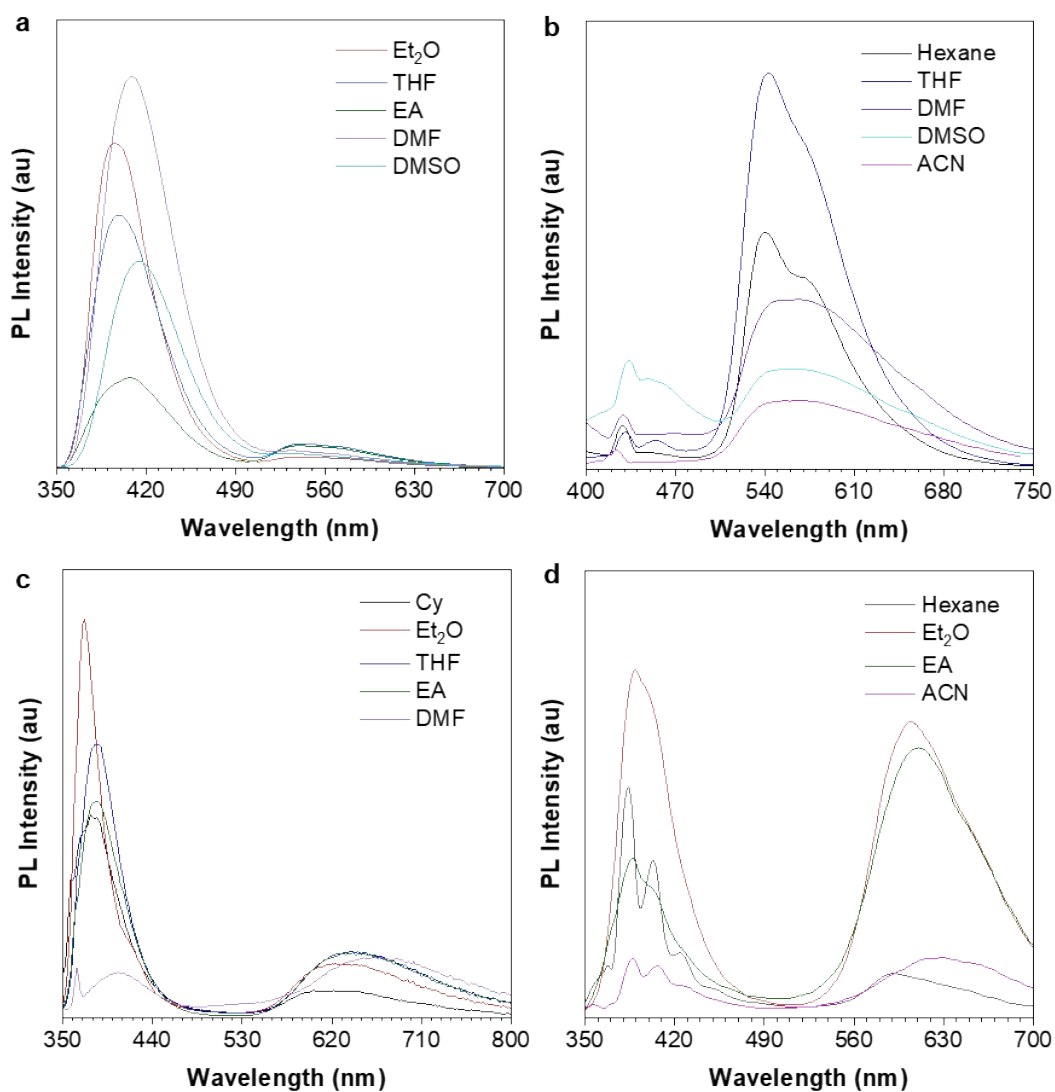

**Figure S15.** The PL spectra of (a) *o*-TPA-Br, (b) *p*-TPA-Br, (c) *o*-Br-TPA, and (d) *p*-Br-TPA in solvents of varying polarity. Concentration: 20  $\mu$ M.

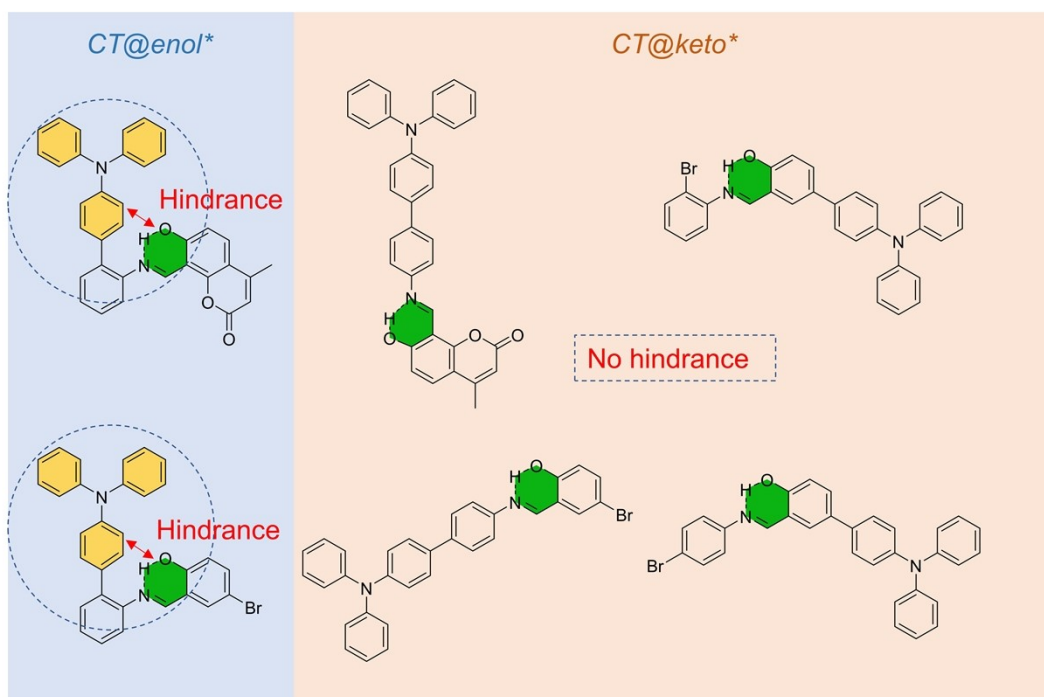

**Figure S16.** The molecular structures of isomers that regulate excited-state processes.

**Table S1.** Crystallographic data for *o*-Br-TPA and *p*-Br-TPA.

|                                              | <i>o</i> -Br-TPA                                   | <i>p</i> -Br-TPA                                   |
|----------------------------------------------|----------------------------------------------------|----------------------------------------------------|
| empirical formula                            | C <sub>31</sub> H <sub>23</sub> BrN <sub>2</sub> O | C <sub>31</sub> H <sub>23</sub> BrN <sub>2</sub> O |
| $M_r$                                        | 519.42                                             | 519.42                                             |
| cryst syst                                   | monoclinic                                         | monoclinic                                         |
| space group                                  | P21/c                                              | I2/a                                               |
| $a$ (Å)                                      | 19.02(3)                                           | 15.4196(10)                                        |
| $b$ (Å)                                      | 13.300(18)                                         | 7.0728(5)                                          |
| $c$ (Å)                                      | 9.799(14)                                          | 44.912(2)                                          |
| $\alpha$ (°)                                 | 90                                                 | 90                                                 |
| $\beta$ (°)                                  | 100.93(3)                                          | 93.069(5)                                          |
| $\gamma$ (°)                                 | 90                                                 | 90                                                 |
| $V$ (Å <sup>3</sup> )                        | 2434(6)                                            | 4891.1(5)                                          |
| $Z$                                          | 4                                                  | 8                                                  |
| $\rho_c$ (g cm <sup>-3</sup> )               | 1.418                                              | 1.411                                              |
| $F(000)$                                     | 1064.0                                             | 2128.0                                             |
| $T$ (K)                                      | 296.15                                             | 293(2)                                             |
| $\mu$ (mm <sup>-1</sup> )                    | 1.716                                              | 2.495                                              |
| data / restraints /<br>parameters            | 4284/0/317                                         | 4699/0/317                                         |
| GOF ( $F^2$ )                                | 1.065                                              | 1.065                                              |
| $R_1^a$ , $wR_2^b$ ( $I >$<br>$2\sigma(I)$ ) | 0.0952,<br>0.1768                                  | 0.0780,<br>0.1931                                  |
| $R_{int}$                                    | 0.1181                                             | 0.0598                                             |

$$^a R_1 = \Sigma(|F_o| - |F_c|)/\Sigma|F_o|; ^b wR_2 = \{\Sigma[w(F_o^2 - F_c^2)^2]/\Sigma[w(F_o^2)^2]\}^{1/2}$$

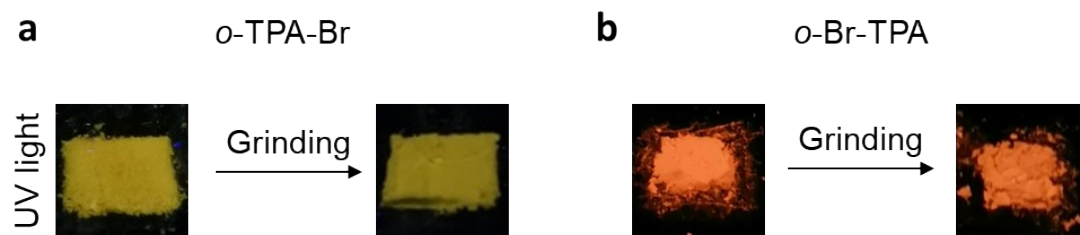

**Figure S17.** The photographs of (a) *o*-TPA-Br and (b) *o*-Br-TPA before and after grinding tanken under 365 nm lamp irradiation.

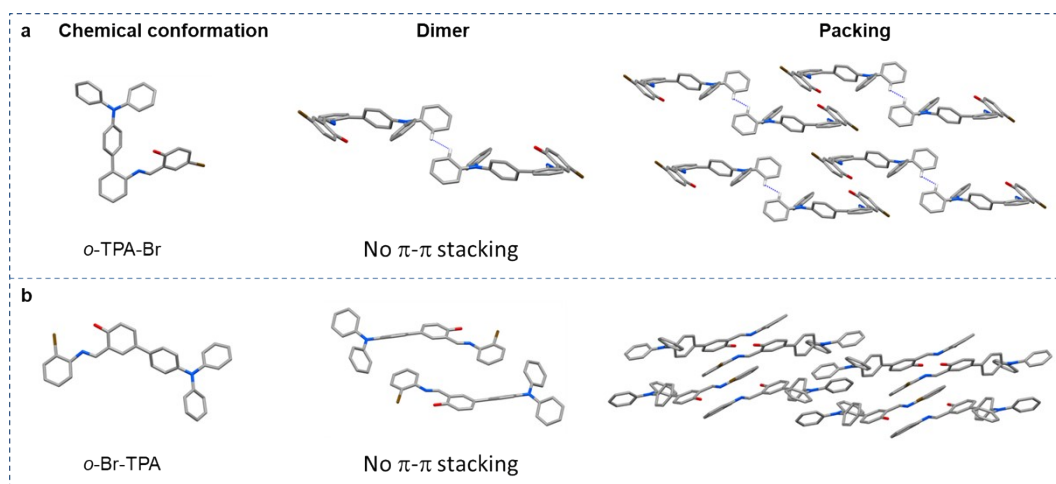

**Figure S18.** The chemical conformations, dimers, and packings of (a) *o*-TPA-Br and (b) *o*-Br-TPA.

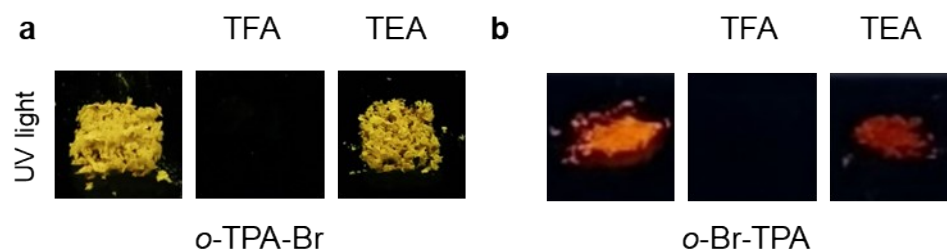

**Figure S19.** Fluorescence photographs of (a) *o*-TPA-Br and (b) *o*-Br-TPA as solid (pristine, sample fumed with TFA, sample fumed with TEA).

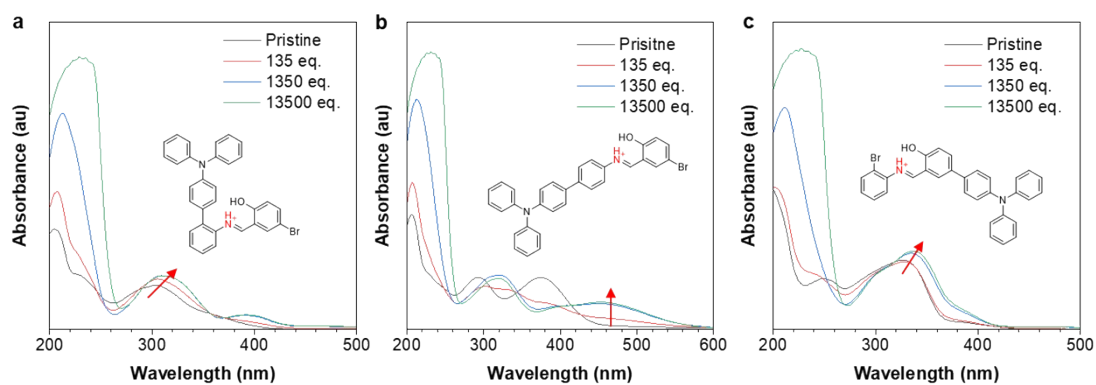

**Figure S20.** Absorption spectra of (a) *o*-TPA-Br, (b) *p*-TPA-Br, and (c) *o*-Br-TPA in pure ACN by adding different equivalents of TFA. Concentration: 20  $\mu$ M.

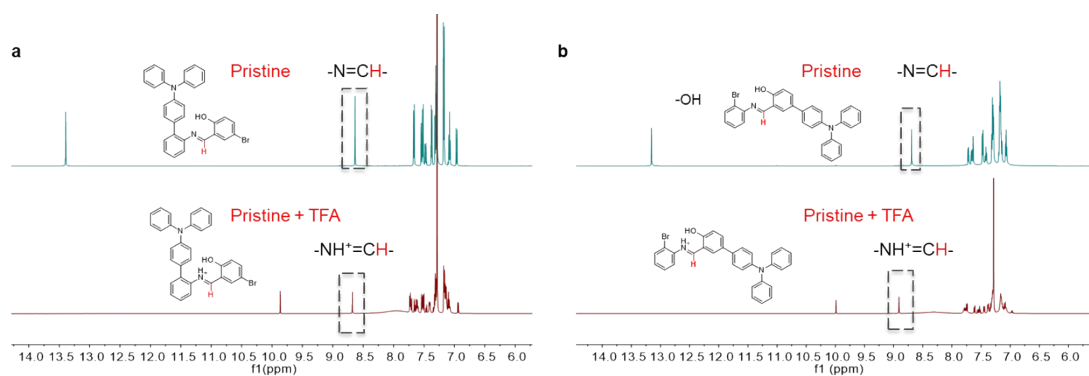

**Figure S21.**  $^1\text{H}$  NMR spectra of (a) *o*-TPA-Br and (b) *o*-Br-TPA in  $\text{CDCl}_3$  before and after TFA fuming in 6.0–14.0 ppm region.

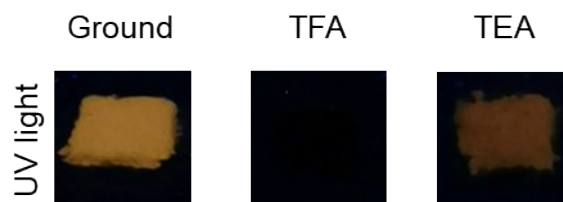

**Figure S22.** Fluorescence photographs of the ground *p*-TPA-Br before and after TFA/TEA treatments.

## References

- [1] X.-M. Cai, W. Zhong, Z. Deng, Y. Lin, Z. Tang, X. Zhang, J. Zhang, W. Wang, S. Huang, Z. Zhao, and B. Z. Tang, *Chem. Eng. J.*, 2023, **466**, 143353.
